# Supplementary material for: Is Maximizing a Bad Thing?
Source: Atypon-hosted journal article supplement (doi:10.1027/1614-0001/a000226), 2017-04-01
Supplement: 1614-0001_a000226_esm1.pdf [file 1614-0001_a000226_esm1.pdf]

Electronic Supplemental Material #1

Table S.1

*Descriptive Statistics on Parcels of Latent Variables*

| Scale<br>Parcels | Mean | SD  |
|------------------|------|-----|
| Max1             | 3.72 | .67 |
| Max2             | 3.29 | .78 |
| Max3             | 3.55 | .60 |
| CFC1             | 3.71 | .71 |
| CFC2             | 3.46 | .57 |
| CFC3             | 3.51 | .75 |
| GC1              | 3.52 | .63 |
| GC2              | 3.40 | .49 |
| GC3              | 3.58 | .61 |

*Note.* Scale parcels created from random allocation of items. Max = Maximizing (3 items per parcel); CFC = Consideration for future consequences (4 items per parcel); GC = Generativity concerns (6 items per parcel).

<sup>a</sup> N = 354 (listwise deletion).

Table S.2

*Intercorrelations between Parcels of Latent Variables*

|      | Max1 | Max2  | Max3  | CFC1  | CFC2  | CFC3  | GC1   | GC2    | GC3   |
|------|------|-------|-------|-------|-------|-------|-------|--------|-------|
| Max1 | -    | .70** | .58** | .26** | .19** | .16** | .30** | .401** | .35** |
| Max2 |      | -     | .66** | .24** | .19** | .10   | .27** | .41**  | .31** |
| Max3 |      |       | -     | .17** | .14** | .09   | .12*  | .30**  | .14*  |
| CFC1 |      |       |       | -     | .61** | .75** | .30** | .21**  | .32** |
| CFC2 |      |       |       |       | -     | .48** | .23** | .13*   | .22** |
| CFC3 |      |       |       |       |       | -     | .20** | .07    | .18** |
| GC1  |      |       |       |       |       |       | -     | .66**  | .76** |
| GC2  |      |       |       |       |       |       |       | -      | .63** |
| GC3  |      |       |       |       |       |       |       |        | -     |

*Note.* Max = Maximizing; CFC = Consideration for future consequences; GC = Generativity concerns.

<sup>a</sup> N = 354 (listwise deletion).

\*  $p < .05$ . \*\*  $p < .01$ .

Table S.3

*Frequency and Percentage of K Values*

| K Values | Frequency | Percentages |
|----------|-----------|-------------|
| 0        | 79        | 22%         |
| .11      | 61        | 17%         |
| .25      | 72        | 20%         |
| .43      | 24        | 7%          |
| .67      | 32        | 9%          |
| 1        | 37        | 10%         |
| 1.5      | 9         | 3%          |
| 2.33     | 5         | 2%          |
| 9        | 33        | 9%          |

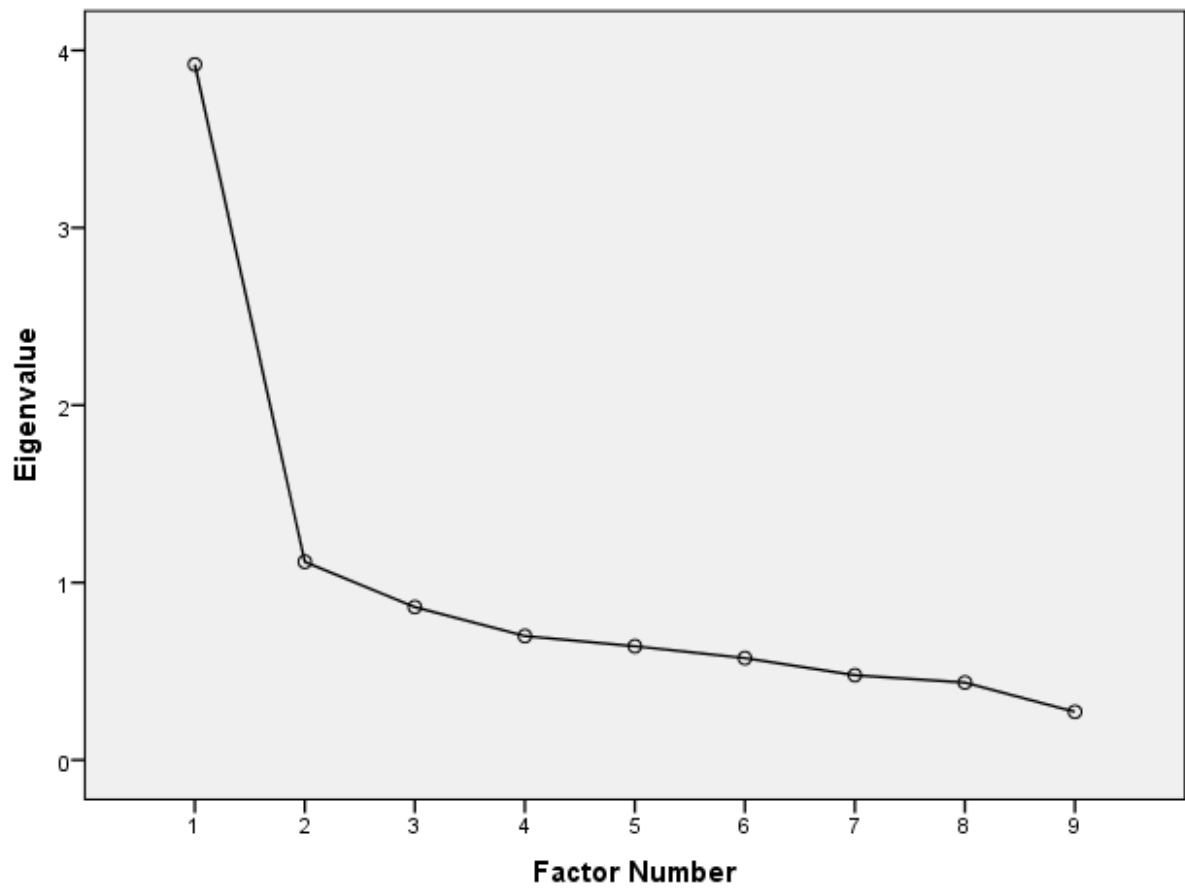

*Figure S.1.* Scree plot of maximizing tendency scale. Two factors above the eigenvalues above 1 were extracted where Factor 1 explained 38.16% of the variance and Factor 2 explained an additional 6.47% of the variance. Based on the sharp elbow at Factor 2, a 1-factor solution for maximizing was retained.

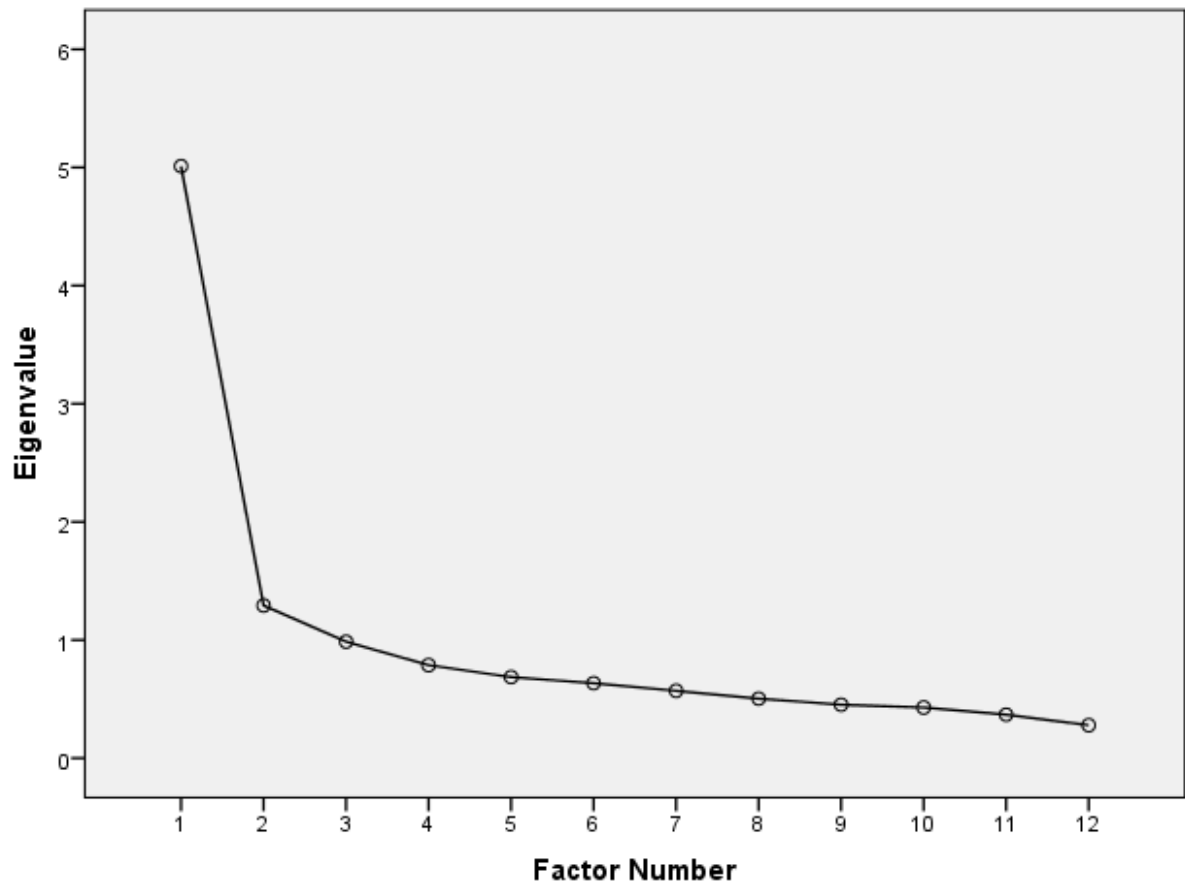

*Figure S.2.* Scree plot of consideration for future consequences (CFC) scale. Two factors above the eigenvalues above 1 were extracted where Factor 1 explained 37.63% of the variance and Factor 2 explained an additional 5.82% of the variance. Based on the sharp elbow at Factor 2, a 1-factor solution for CFC was retained.

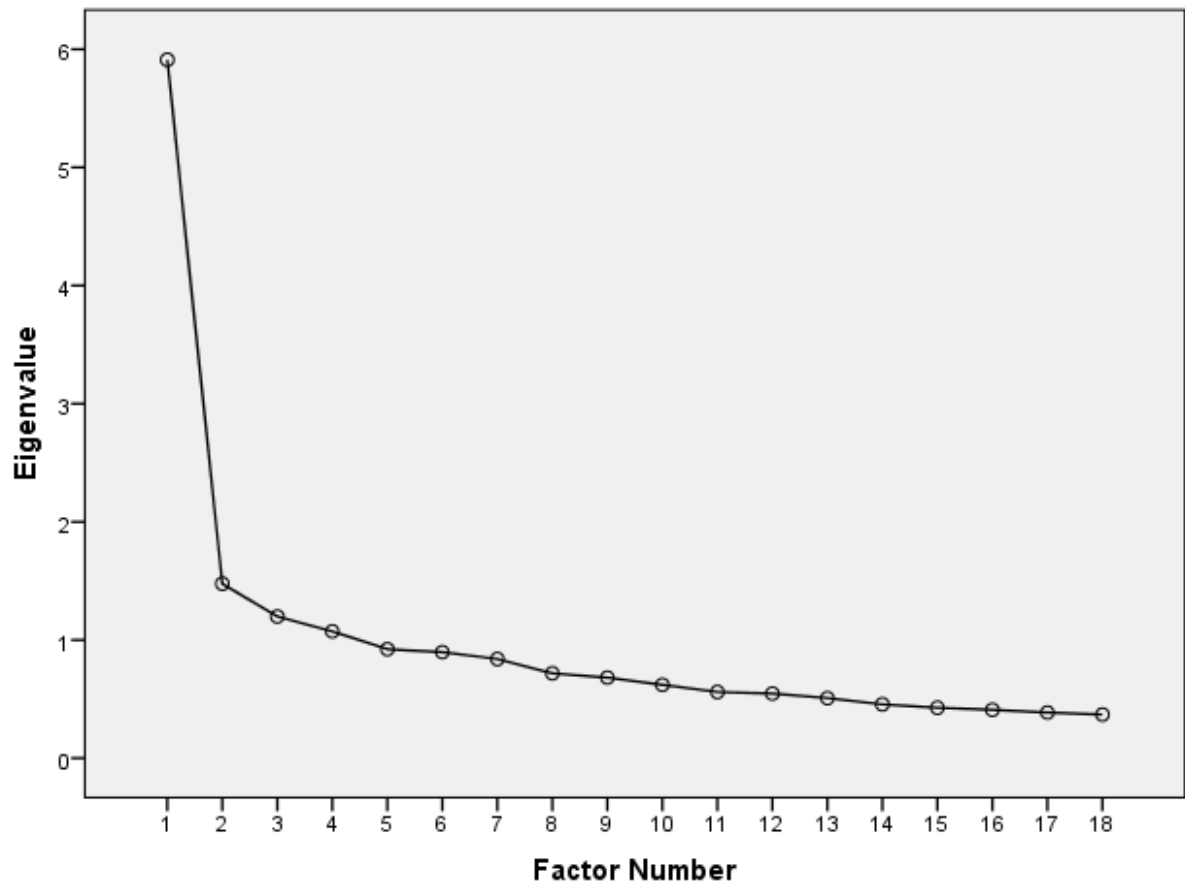

*Figure S.3.* Scree plot of consideration for generativity concerns (GC) scale. Four factors above the eigenvalues above 1 were extracted, where Factor 1 explained 29.82% of the variance, Factor 2 explained an additional 5.11%, Factor 3 explained an additional 3.02%, and Factor 4 explained an additional 2.34% of the variance. Based on the sharp elbow at Factor 2, a 1-factor solution for GC was retained.

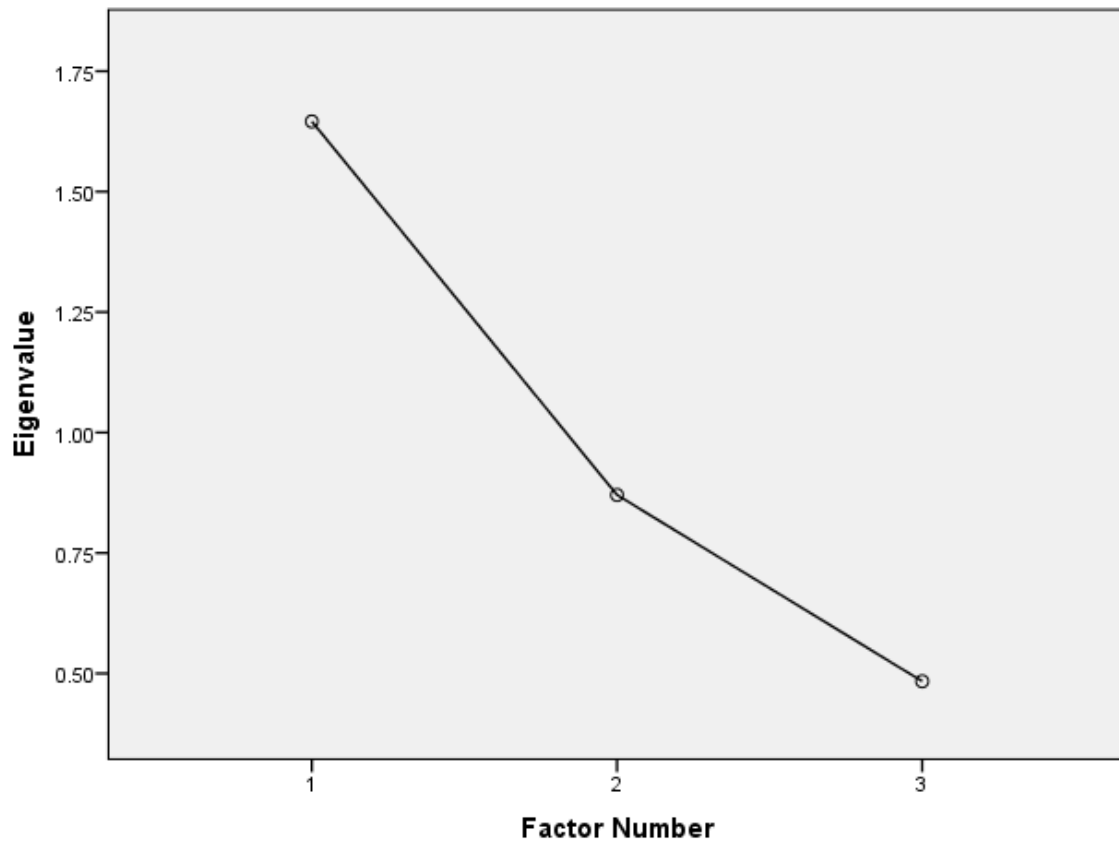

*Figure S.4.* Scree plot of saving intentions scale. One factors above the eigenvalues above 1 were extracted. Factor 1 explained 54.86% of the variance. Based on the sharp elbow at Factor, a 1-factor solution for saving intentions was retained.
